# Supplementary material for: OXF: a new natural reference material for use in LA-ICP-MS U–Pb columbite–tantalite geochronology
Source: Royal Society of Chemistry journal article supplement (doi:10.1039/d4ja00195h), 2024-01-01
Supplement: d4ja00195h1.xlsx [file d4ja00195h1.xlsx]

## Sheet: Table S1
Statistics of the columbite-tantalite reference materials and their U-Pb ages. Statistics of the columbite-tantalite reference materials and their U-Pb ages.
Ref.material name	U-Pb isotopic compositions		U, Th, Pb elemental compositions (2s)		f206 (%)	comment	MnO (% m/m)	FeO (% m/m)	Nb2O5 (% m/m)	Ta2O5 (% m/m)	Mn#	Ta#	Ref.
	Age (Ma) (2s)	Method	U (ppm)	Pb (ppm)
Coltan 139	506.6 ± 2.4; 507.8 ± 1.3	ID-TIMS	1697	171	0%–8.29%	high U, Pb contents, variable common Pb	8.99	10.38	56.92	22.31	0.47	0.11	1, 2
CT1	2046.8 ± 1.1	ID-TIMS	199 ± 12	72 ± 5.4	—	homogeneous U, Pb contents; low common Pb	0.73	14.8	7.19	75.2	0.05	0.92	2, 3
CT3	2053.2 ± 1.3	ID-TIMS	308 ± 16	112 ± 6.6	—	homogeneous U, Pb contents; low common Pb	0.97	14.5	6.44	76.2	0.06	0.93	2, 3
CT4	2044 ± 1.6	ID-TIMS	175.6 ± 7.8	65 ± 3.9	—	homogeneous U, Pb contents; variable common Pb	0.62	14.8	7.51	75.1	0.04	0.92	3
ISSIA2	2002 ± 32	ID-TIMS	503 ± 552	137 ± 350	—	high and variable U contents; high common Pb	9.72	6.46	18.4	63.3	0.6	0.8	3
Rongi	931.5 ± 2.5	ID-TIMS	81 ± 23	16 ± 13	0%–1.74%	low and variable U, Pb contents; small variable common Pb	6.84	13.8	66.2	11.5	0.33	0.17	2, 3
Buranga	905.2 ± 3.2	ID-TIMS	80 ± 15	12 ± 4.1	—	homogeneous U, Pb contents; variable common Pb	9.78	11.1	64.7	11.9	0.47	0.18	2, 3
NP2	380.3 ± 2.4	ID-TIMS	257 ± 67	15 ± 2.7	—	variable U contents; high common Pb	6.54	10.5	42.7	38.1	0.38	0.51	3
A-1	198.3 ± 1.4	ID-TIMS	215 ± 309	12 ± 9.3	—	variable U, Pb contents; low common Pb	14.3	2.87	27.7	54.6	0.83	0.7	3
CC1716	326.3 ± 0.6	ID-TIMS	268 ± 427	26 ± 6.2	—	high and variable U, Pb contents; variable common Pb	6.11	15.4	70.5	6.5	0.28	0.1	3
SN3	404.0 ± 1.3	ID-TIMS	585 ± 249	36 ± 17	0%–0.76%	low common Pb	2.6	17.92	64.58	9.72	0.13	0.08	2, 4
HND	136.2 ± 0.9	ID-TIMS	357 ± 139	7.5 ± 2.5	0%–1.86%	variable common Pb	8.69	11.83	60.17	17.53	0.43	0.15	2, 4
RL2	135.7 ± 0.3	ID-TIMS	486 ± 343	9.7 ± 7.1	0%–1.55%	variable common Pb	9.72	8.04	31.85	49.33	0.44–0.47	0.36–0.51	2, 4
DDB	202.0 ± 1.0	ID-TIMS	515 ± 130	16 ± 3.3	0%–4.65%	variable common Pb	11.4	7.86	58.51	20.74	0.6	0.18	2
ZKW	203.0 ± 1.6	ID-TIMS	205 ± 168	6.2 ± 4.9	0%–1.19%	variable common Pb	12.67	5.88	50.8	29.95	0.69	0.27	2
Mn# = Mn/(Fe + Mn) (atomic ratios).
Ta# = Ta/(Nb + Ta) (atomic ratios).
1 F. Melcher, T. Graupner, H.-E. Gäbler, M. Sitnikova, F. Henjes-Kunst, T. Oberthür, A. Gerdes and S. Dewaele, Ore Geol. Rev., 2015, 64, 667–719.
2 M. Yang, Y. H. Yang, R. L. Romer, X. D. Che, R. C. Wang, F. Y. Wu, G. C. Fei, Y. Deng and T. Wu, J. Anal. At. Spectrom., 2023, 38, 1816–1829.
3 H. Legros, J. Mercadier, J. Villeneuve, R. L. Romer, E. Deloule, M. Van Lichtervelde, S. Dewaele, P. Lach, X. D. Che, R. C. Wang, Z. Y. Zhu, E. Gloaguen and J. Melleton, Chem. Geol., 2019, 512, 69–84.
4 L. Xiang, R.C. Wang, R. L. Romer, X. Che, H. Hu and Z.M. Tang, Geostand. Geoanal. Res., 2023, 47, 609–628.

## Sheet: Table S2
Electron probe microanalysis data of Coltan 139 and OXF
	Sc2O3	TiO2	MnO	FeO	ZrO2	Nb2O5	SnO2	Ta2O5	WO3
Coltan139-1	0.3769	3.4791	8.9179	10.294	0.2612	62.3502	0.7937	12.4889	0.561
Coltan139-2	0.6378	3.6262	8.736	10.0767	0.3021	62.089	0.5808	12.118	0.5676
Coltan139-3	0.8987	3.5791	8.6635	10.1589	0.213	61.6286	0.7709	12.2819	0.5175
Coltan139-4	0.4273	3.6612	8.5977	10.1804	0.1995	62.9076	0.7371	12.7771	0.6853
Coltan139-5	0.8361	3.7271	8.7704	10.0952	0.2478	62.3836	0.5684	12.4442	0.8138
Coltan139-6	0.6573	3.3729	8.8554	10.0765	0.2328	62.8698	0.7465	12.8217	0.7999
Coltan139-7	0.2531	3.5464	8.8633	10.15	0.2513	62.598	0.6569	12.5985	0.5636
Coltan139-8	0.1525	3.7099	8.8408	9.9671	0.1981	63.1465	0.6865	12.283	0.8886
Coltan139-9	0.1618	3.6438	8.6675	9.9639	0.1894	63.2054	0.5894	12.3899	0.4431
Coltan139-10	0.9151	3.7539	8.8568	10.0199	0.2379	62.2208	0.6347	12.5778	0.5244
OXF-1	0.0239	0.5538	10.1687	10.9004	0.0322	69.3893	0	8.1287	0.4886
OXF-2	0.0038	0.5173	10.1313	10.7411	0.0591	69.7621	0.0091	7.9674	0.2654
OXF-3	0.049	0.4981	10.2437	10.8014	0.0759	70.1662	0.0273	7.9815	0.203
OXF-4	0.0647	0.6122	9.9408	11.2251	0.0456	69.5806	0	7.9301	0.1506
OXF-5	0.0506	0.5474	10.2186	10.6445	0.0675	69.1518	0.0113	7.9345	0.1626
OXF-6	0.0623	0.566	10.1699	10.997	0.0372	69.8529	0.0329	8.4156	0.0199
OXF-7	0.0378	0.5083	10.2204	10.6546	0.0609	70.2534	0.0114	8.4079	0.3223
OXF-8	0.0621	0.5104	9.8682	10.6823	0.0456	70.0588	0.0745	7.966	0.2127
OXF-9	0.0216	0.4576	10.1757	10.7122	0.0675	69.6588	0.0293	7.9554	0.189
OXF-10	0	0.4888	10.1827	10.5702	0.0152	69.5118	0.0504	8.7495	0.2298
OXF-11	0.0061	0.5049	10.3006	10.7684	0.0101	69.5326	0.0593	7.9959	0.471
OXF-12	0.1104	0.4748	10.244	10.8103	0.0338	69.5667	0.0982	7.9867	0.4048
Trace elements of Coltan 139 and OXF
	Y	La	Ce	Pr	Nd	Sm	Eu	Gd	Tb	Dy	Ho	Er	Tm	Yb	Lu
Coltan139-1	1891.47	0.136351	3.63998	1.84428	23.6571	100.146	0.124987	241.883	70.7173	367.776	37.1349	63.1588	9.16702	67.6803	7.96092
Coltan139-2	1898.69	0.186419	3.61148	1.94089	22.9074	100.322	0.0975574	245.75	71.2965	368.757	37.6233	63.5881	9.36122	69.9745	8.24538
Coltan139-3	1929.64	0.196762	3.35799	1.80608	23.2672	100.512	0.151708	253.237	72.3408	370.74	37.6104	64.28	9.70055	69.1955	8.33196
Coltan139-4	1956.57	0.191949	3.82597	1.88896	24.2112	105.322	0.143362	254.171	72.7575	377.075	38.0429	65.6934	9.58576	71.0087	8.54107
Coltan139-5	1977.84	0.148914	4.20739	1.88023	25.6618	102.244	0.170448	260.38	74.0611	387.862	39.4584	66.1384	9.77452	71.4591	8.49459
Coltan139-6	1959.68	0.162926	4.045	1.80958	24.2185	105.274	0.133117	257.077	73.7617	390.066	38.8893	65.7857	9.60508	71.5019	8.52504
Coltan139-7	1920.32	0.145528	4.04848	1.63077	22.5872	99.8186	0.133783	243.623	72.1773	368.535	37.2856	64.3211	9.55592	69.7248	8.27022
Coltan139-8	1912.69	0.137716	3.71164	1.92466	23.6509	99.5149	0.117903	248.227	71.2018	374.001	37.3678	65.2894	9.41161	69.5318	8.20666
Coltan139-9	1908.56	0.125557	3.86796	1.78683	23.4895	102.129	0.13583	248.811	70.9551	368.117	37.1381	62.909	9.29867	67.8598	8.43607
Coltan139-10	1923.61	0.108537	4.02193	1.75932	24.6021	100.554	0.148271	245.124	72.3423	376.197	37.659	65.5772	9.40528	69.5577	8.45496
OXF-1	0.725884	0.00287189	0.0164454	0.00469099	0	0.044482	0.00508928	0.0142764	0.00126932	0.0373575	0.000767553	0.00436185	0.00188816	0	0.000753946
OXF-2	1.0615	0	0.0197236	0	0.078069	0.00934247	0.00402405	0.0326505	0.00801857	0.0102802	0.0202942	0.0147888	0	0.0264244	0.00874089
OXF-3	1.18941	0.00057373	0.012231	0.00585545	0.0395444	0	0.00660742	0.0224556	0.0114119	0.109828	0.0154082	0.00914847	0.00700487	0.0095644	0.00203442
OXF-4	1.20484	0	0.0115916	0	0.0413209	0.038201	0.00265382	0.0117247	0.00858244	0.0701531	0.0064844	0.0197905	0.0059886	0.0442641	0.00307084
OXF-5	0.689748	0.00121676	0.0105663	0.00372334	0.0419701	0.033458	0.0113141	0.0119013	0.0038729	0.0529362	0.00268172	0.0256322	0.000901121	0.018856	0.00455899
OXF-6	1.25755	0.00284276	0.0100359	0.00876094	0	0	0	0.0141206	0.0020109	0.111934	0.00379668	0.0215779	0.00327634	0.0376736	0
OXF-7	0.611062	0	0.0200436	0.00196489	0.0525335	0.0260934	0.00426571	0.0286042	0.00934754	0.0524086	0.00120648	0.018514	0.00558065	0.0100631	0.00499386
OXF-8	0.950717	0.00217617	0.0157567	0	0	0	0.00935558	0	0.00197948	0.0786912	0.0129506	0.0339722	0.00230529	0.0282113	0.00515771
OXF-9	0.899333	0.0103201	0.0137879	0.00709749	0	0	0.00513721	0.0252161	0.00154022	0.0479591	0.00516648	0.0212897	0.00382796	0.00154115	0
OXF-10	1.11864	0.0159153	0.0220971	0.00675455	0	0.0458127	0.00880111	0.0185142	0.00607056	0.0597977	0.0045143	0.0407523	0.00049215	0.0364626	0.00445767
NIST614-1	0.816517	0.66883	0.74266	0.709893	0.798465	0.671556	0.589785	0.689223	0.689068	0.623615	0.720442	0.632313	0.672011	0.793643	0.666809
NIST614-2	0.693561	0.701731	0.68072	0.674998	0.646856	0.63119	0.767946	0.834382	0.646614	0.676962	0.704622	0.650335	0.609237	0.77253	0.658405
Recommened trace elements of NIST614
ref.1	Y	La	Ce	Pr	Nd	Sm	Eu	Gd	Tb	Dy	Ho	Er	Tm	Yb	Lu
NIST614	0.8	0.69	0.79	0.77	0.74	0.76	0.76	0.8	0.73	0.78	0.78	0.78	0.73	0.79	0.73
1 K. P. Jochum, U. Weis, B. Stoll, D. Kuzmin, Q.C. Yang, I. Raczek, D. E. Jacob, A. Stracke, K. Birbaum, D. A. Frick, D. Günther and J. Enzweiler, Geostand. Geoanal. Res., 2011, 35, 397-429.

## Sheet: Table S3
LA-ICP-MS U-Pb dating results for columbite-tantalite OXF using Coltan 139 as the reference material
Sample/	207Pb	±1s	207Pb	±1s	206Pb	±1s	Rho		207Pb	±1s	207Pb	±1s	206Pb	±1s
spot #	206Pb	abs	235U	abs	238U	abs			206Pb		235U		238U
LA-ICP-MS results (CUGW-session 1)
OXF-01	0.051303	0.000758389	0.296419	0.00478082	0.0420112	0.000310394	0.326844		253.77	33.33	263.599	3.74873	265.287	1.92559
OXF-02	0.0522156	0.000825936	0.287851	0.00510465	0.039939	0.000308683	0.427047		294.505	37.035	256.866	4.02846	252.455	1.91833
OXF-03	0.0522958	0.00065156	0.296061	0.00412021	0.0412264	0.000322318	0.421496		298.21	-2.7775	263.319	3.23289	260.43	2.00048
OXF-04	0.0482316	0.000907316	0.286596	0.00467695	0.0413461	0.000329766	0.437162		109.35	44.44	255.876	3.69515	261.172	2.04627
OXF-05	0.0527596	0.000792784	0.301667	0.00478845	0.041678	0.000309198	0.311643		316.725	35.1825	267.702	3.73973	263.226	1.91874
OXF-06	0.0468382	0.000907249	0.296729	0.00443937	0.0433842	0.000362573	0.354424		42.69	44.44	263.842	3.48081	273.776	2.24498
OXF-07	0.0507784	0.000662326	0.283141	0.004101	0.0405614	0.000276095	0.372963		231.55	24.995	253.146	3.24979	256.312	1.71603
OXF-08	0.0501056	0.000834212	0.290471	0.00421349	0.0414526	0.000297384	0.236126		198.23	38.88	258.93	3.31998	261.831	1.84618
OXF-09	0.05362	0.000802598	0.309238	0.00473261	0.042598	0.000276595	0.268628		353.76	33.33	273.59	3.6751	268.917	1.71635
OXF-10	0.0477718	0.000975479	0.29077	0.00419095	0.0419845	0.000284046	0.285552		87.13	80.545	259.165	3.30152	265.122	1.76312
OXF-11	0.050324	0.000810589	0.289548	0.00433889	0.0409445	0.000368488	0.275191		209.33	41.6575	258.204	3.42093	258.685	2.28626
OXF-12	0.0476858	0.00087679	0.287725	0.00416747	0.0419088	0.00027798	0.289402		83.425	44.44	256.767	3.29072	264.653	1.72582
OXF-13	0.0488222	0.00100756	0.301279	0.0047854	0.0425645	0.000334566	0.25651		138.975	43.515	267.399	3.73845	268.71	2.07378
OXF-14	0.0521261	0.000734646	0.292464	0.00463479	0.0408125	0.000334665	0.383329		300.06	33.33	260.497	3.64548	257.867	2.07746
OXF-15	0.0522962	0.000852537	0.300781	0.00509171	0.0420386	0.000336583	0.273809		298.21	41.6625	267.01	3.97871	265.457	2.08715
OXF-16	0.0499345	0.000818015	0.286874	0.00442489	0.041251	0.000286574	0.271098		190.82	37.0275	256.096	3.49572	260.583	1.77976
OXF-17	0.0485143	0.000834946	0.2842	0.0042438	0.0416419	0.000258173	0.289044		124.16	40.7375	253.984	3.3599	263.002	1.60406
OXF-18	0.049479	0.000787284	0.298827	0.00443437	0.0427785	0.000316696	0.439306		172.305	37.03	265.484	3.47135	270.032	1.96323
OXF-19	0.0494008	0.000904703	0.287683	0.00554235	0.0424737	0.000358871	0.326585		168.6	42.585	256.734	4.37382	268.148	2.22389
OXF-20	0.0511219	0.000680067	0.299617	0.00455521	0.0428543	0.000416591	0.469657		255.62	29.625	266.101	3.56356	270.501	2.5793
OXF-21	0.0503332	0.000902397	0.307392	0.0049707	0.0424634	0.000348009	0.470188		209.33	40.7325	272.158	3.86491	268.084	2.15689
OXF-22	0.0523165	0.00076082	0.302488	0.00502639	0.0420592	0.000400167	0.457657		298.21	33.33	268.342	3.92268	265.584	2.47968
OXF-23	0.0510671	0.000761497	0.289338	0.00499727	0.0410374	0.00035499	0.401123		242.66	35.18	258.038	3.93938	259.26	2.20266
OXF-24	0.0511152	0.000850836	0.305682	0.00549766	0.0434501	0.000351397	0.290218		255.62	38.8825	270.828	4.2793	274.183	2.17597
OXF-25	0.0512127	0.000708459	0.292689	0.00491921	0.0413676	0.000382783	0.498485		250.065	33.3275	260.674	3.86801	261.305	2.37376
OXF-26	0.0521323	0.000698813	0.290581	0.00449203	0.0405704	0.000366258	0.409468		300.06	29.6275	259.017	3.53856	256.368	2.27322
OXF-27	0.0526897	0.000854367	0.304471	0.00559841	0.0419954	0.000389762	0.386515		322.28	37.035	269.886	4.36159	265.19	2.41555
OXF-28	0.0492087	0.000843407	0.288272	0.00440635	0.0410292	0.000342157	0.374731		166.75	40.7375	257.198	3.47737	259.209	2.12337
OXF-29	0.0486544	0.000929317	0.297353	0.0045948	0.0420825	0.000341193	0.417074		131.57	44.44	264.33	3.60065	265.728	2.11552
OXF-30	0.0529844	0.000681554	0.31062	0.00487819	0.0426129	0.000339451	0.506529		327.835	34.255	274.661	3.78392	269.009	2.10383
OXF-31	0.0481048	0.000968471	0.2888	0.00437804	0.0413529	0.000360291	0.483596		105.645	46.2925	257.614	3.45369	261.213	2.23481
OXF-32	0.0524246	0.000733535	0.290716	0.00435821	0.0408984	0.000340547	0.422773		305.615	36.1075	259.123	3.43305	258.4	2.11366
OXF-33	0.0528625	0.00072658	0.291459	0.00444986	0.0406079	0.000342867	0.440011		324.13	26.85	259.707	3.50307	256.6	2.12852
OXF-34	0.0521373	0.000581821	0.297659	0.00407985	0.0416616	0.000362113	0.481718		300.06	25.9225	264.57	3.19743	263.124	2.24547
OXF-35	0.0510158	0.000645974	0.305562	0.00492998	0.0437462	0.000465775	0.598434		242.66	60.1775	270.735	3.83865	276.012	2.88059
OXF-36	0.0502331	0.000852273	0.290424	0.00490455	0.0415939	0.000442792	0.403533		205.63	45.36	258.893	3.86321	262.705	2.74411
OXF-37	0.0477176	0.000960899	0.290085	0.00511083	0.0421319	0.000366594	0.453617		87.13	48.145	258.626	4.02641	266.034	2.27222
OXF-38	0.051122	0.000733388	0.298572	0.00507431	0.0424848	0.000398182	0.446993		255.62	33.3275	265.284	3.97182	268.217	2.4665
OXF-39	0.0517429	0.000770726	0.293537	0.0047001	0.0414738	0.000350597	0.316535		272.285	35.1825	261.339	3.6937	261.962	2.1747
OXF-40	0.0525692	0.000673485	0.29627	0.00441349	0.0410204	0.000340255	0.429894		309.32	29.6275	263.483	3.46177	259.155	2.11164
OXF-41	0.0525541	0.000823086	0.30527	0.0052138	0.0427217	0.000371006	0.338273		309.32	37.0325	270.508	4.06003	269.681	2.29829
OXF-42	0.0525221	0.000812814	0.301981	0.00522107	0.0419933	0.00034222	0.412225		309.32	35.1825	267.946	4.07586	265.176	2.12202
OXF-43	0.0529705	0.000639227	0.294322	0.00428001	0.0405478	0.00031032	0.516067		327.835	27.775	261.955	3.36235	256.228	1.92747
LA-ICP-MS results (CUGW-session 2)
OXF-01	0.0511225	0.000739648	0.297104	0.00497435	0.0423651	0.000362391	0.510906		255.62	33.3275	264.136	3.8981	267.476	2.24582
OXF-02	0.0518848	0.000789069	0.294461	0.00510278	0.0412785	0.00036073	0.504288		279.69	33.33	262.065	4.00662	260.753	2.23766
OXF-03	0.0512703	0.000812499	0.291558	0.00513764	0.0415461	0.00039709	0.542401		253.77	41.66	259.785	4.04292	262.409	2.46178
OXF-04	0.052102	0.00077751	0.288773	0.00498994	0.0402839	0.000365845	0.525566		300.06	35.18	257.593	3.93531	254.592	2.27123
OXF-05	0.0510222	0.000868844	0.292258	0.00556451	0.041714	0.000393392	0.495317		242.66	34.2525	260.335	4.37586	263.449	2.43857
OXF-06	0.0513816	0.000723489	0.28567	0.0045465	0.0404674	0.000347439	0.539463		257.47	33.33	255.146	3.59487	255.729	2.15705
OXF-07	0.0508414	0.000833643	0.286736	0.00536431	0.0411282	0.000437431	0.56851		235.25	69.4325	255.987	4.23664	259.822	2.7121
OXF-08	0.0516546	0.000914538	0.281474	0.0052611	0.0398894	0.000320818	0.430291		333.39	40.7375	251.826	4.17218	252.147	1.99345
OXF-09	0.051167	0.00085931	0.286209	0.0052483	0.0408079	0.000359913	0.48097		255.62	38.885	255.571	4.14686	257.839	2.23353
OXF-10	0.0511404	0.000887464	0.287733	0.00537543	0.0408927	0.000315632	0.413154		255.62	40.735	256.774	4.24214	258.364	1.95973
OXF-11	0.0519172	0.00080046	0.302264	0.00535393	0.0422551	0.000357424	0.477549		283.395	30.5525	268.167	4.17848	266.796	2.21538
OXF-12	0.0512017	0.000890294	0.290221	0.00536651	0.0412534	0.000291864	0.382612		250.065	45.365	258.733	4.22702	260.597	1.81241
OXF-13	0.0531386	0.000823277	0.304422	0.00534995	0.0417051	0.000362277	0.494285		344.5	35.18	269.848	4.16853	263.393	2.2464
OXF-14	0.0514108	0.000724897	0.286523	0.00427477	0.0405686	0.00024941	0.412069		257.47	33.33	255.819	3.37833	256.356	1.5513
OXF-15	0.0510845	0.000765872	0.289809	0.00478255	0.0412334	0.000305992	0.44969		255.62	35.18	258.409	3.76909	260.473	1.89965
OXF-16	0.050171	0.000986942	0.297946	0.0036265	0.0425115	0.000277577	0.264585		211.185	44.435	264.794	2.84272	268.382	1.72252
OXF-17	0.0490187	0.000975267	0.287245	0.00384841	0.0420261	0.000300466	0.349443		150.085	46.2925	256.389	3.04064	265.379	1.86432
OXF-18	0.0492553	0.000917721	0.285018	0.00344376	0.0414542	0.000316598	0.318493		166.75	44.4375	254.631	2.72666	261.84	1.96478
OXF-19	0.0527502	0.000983284	0.301865	0.00417063	0.0420449	0.000324829	0.383871		316.725	42.5875	267.856	3.25796	265.496	2.0146
OXF-20	0.0512865	0.000983703	0.285007	0.00391835	0.0404298	0.000300521	0.365636		253.77	44.44	254.622	3.10103	255.497	1.86711
OXF-21	0.0497168	0.000952978	0.285077	0.00400109	0.0411438	0.000297265	0.336227		188.97	16.6625	254.677	3.16614	259.919	1.84591
OXF-22	0.0496575	0.000989737	0.287548	0.00391225	0.040548	0.000308606	0.463263		188.97	50.915	256.627	3.0902	256.229	1.91688
OXF-23	0.0522229	0.000730314	0.299627	0.00463856	0.042001	0.000327533	0.417795		294.505	33.33	266.109	3.62856	265.224	2.03136
OXF-24	0.0494125	0.000854462	0.296676	0.00406735	0.0422363	0.000323204	0.411001		168.6	38.8825	263.8	3.19005	266.68	2.00426
OXF-25	0.0528299	0.000840084	0.281609	0.00404635	0.0403111	0.00032853	0.374156		320.43	41.6625	251.933	3.21039	254.761	2.04042
OXF-26	0.0506176	0.00104984	0.285582	0.00437828	0.0402888	0.000300095	0.311375		233.4	78.69	255.076	3.46242	254.623	1.86469
OXF-27	0.0485927	0.000853636	0.282268	0.00414537	0.0406023	0.000298205	0.396932		127.865	40.735	252.455	3.28706	256.565	1.85254
OXF-28	0.050479	0.000868796	0.30016	0.00423829	0.0425422	0.000325716	0.453813		216.74	40.73	266.525	3.31492	268.571	2.01923
OXF-29	0.0503104	0.000704524	0.290685	0.00439569	0.0420448	0.000266594	0.279778		209.33	33.325	259.099	3.46258	265.495	1.65545
OXF-30	0.0511301	0.000637694	0.286298	0.00399472	0.0407774	0.00029287	0.39262		255.62	29.625	255.641	3.15815	257.65	1.81932
OXF-31	0.0516719	0.000675769	0.297719	0.00434948	0.0419187	0.000316105	0.393495		333.39	31.4775	264.617	3.40794	264.715	1.96097
OXF-32	0.0531075	0.000711098	0.310285	0.00467687	0.0424231	0.000298386	0.388136		344.5	31.48	274.402	3.62906	267.835	1.8509
OXF-33	0.0519494	0.000668818	0.293808	0.00430473	0.0410993	0.00031599	0.440731		283.395	34.255	261.552	3.38304	259.643	1.96161
OXF-34	0.0516066	0.000681764	0.30063	0.0044548	0.0423517	0.000342449	0.455953		333.39	29.6275	266.892	3.48253	267.394	2.12279
OXF-35	0.0515093	0.000649166	0.294875	0.00438816	0.0415958	0.000321339	0.473751		264.88	32.405	262.389	3.44562	262.717	1.99381
LA-ICP-MS results (CUGW-session 3)
OXF-01	0.0524347	0.000601565	0.305361	0.00456501	0.0423357	0.000420557	0.568241		305.615	25.925	270.579	3.55569	267.295	2.60497
OXF-02	0.050772	0.000570665	0.295065	0.00431651	0.0422644	0.000416682	0.582112		231.55	23.1425	262.538	3.38902	266.854	2.58121
OXF-03	0.0512644	0.000565861	0.292278	0.00408332	0.0415102	0.000395343	0.538627		253.77	25.9225	260.351	3.21327	262.187	2.45106
OXF-04	0.0512284	0.000637946	0.293716	0.00427592	0.0418873	0.00042538	0.414118		250.065	29.625	261.48	3.36069	264.52	2.6358
OXF-05	0.0514841	0.000519887	0.301698	0.00421952	0.0425246	0.000398638	0.641663		261.175	24.0725	267.725	3.29645	268.463	2.46923
OXF-06	0.0525594	0.000610562	0.306436	0.00441622	0.0423705	0.000373677	0.528527		309.32	30.5525	271.415	3.43732	267.51	2.31547
OXF-07	0.0525302	0.000591816	0.307743	0.0045133	0.0426234	0.000414994	0.570159		309.32	30.5525	272.43	3.5092	269.073	2.56997
OXF-08	0.0534535	0.000734905	0.306202	0.00524775	0.0416429	0.000438891	0.545418		346.35	36.1075	271.233	4.08353	263.008	2.71987
OXF-09	0.0517243	0.000598519	0.294159	0.00455331	0.0413289	0.000431678	0.617811		272.285	21.295	261.828	3.57691	261.065	2.67604
OXF-10	0.0526889	0.000482196	0.301849	0.00499879	0.0416451	0.000576727	0.737896		322.28	24.9975	267.844	3.90308	263.022	3.57201
OXF-11	0.0524655	0.000600527	0.300266	0.00532464	0.0416468	0.000579104	0.594582		305.615	25.925	266.608	4.16199	263.033	3.5867
OXF-12	0.0512772	0.000706412	0.297263	0.00478665	0.042205	0.000393826	0.453963		253.77	31.4775	264.26	3.75087	266.486	2.4402
OXF-13	0.0510077	0.000681371	0.30408	0.00490905	0.0431239	0.000413812	0.542779		242.66	31.4775	269.582	3.82668	272.168	2.56154
OXF-14	0.0511347	0.000506869	0.298465	0.00413636	0.0423858	0.000424995	0.660777		255.62	49.995	265.2	3.2396	267.604	2.63226
OXF-15	0.0513072	0.000681974	0.293962	0.00481891	0.041464	0.000361846	0.550161		253.77	24.9975	261.673	3.78562	261.901	2.2442
OXF-16	0.0513991	0.000575567	0.298051	0.00424725	0.0421451	0.000384869	0.550364		257.47	25.9225	264.877	3.32723	266.115	2.38502
OXF-17	0.0524746	0.000732345	0.308171	0.00511349	0.0426808	0.000368938	0.458205		305.615	36.1075	272.762	3.97335	269.428	2.28561
OXF-18	0.0513888	0.000715825	0.294607	0.00448333	0.0419202	0.000368801	0.38694		257.47	33.33	262.179	3.52087	264.724	2.28627
OXF-19	0.0516889	0.000635728	0.294586	0.00441682	0.0413386	0.000348489	0.525059		272.285	27.775	262.162	3.46883	261.125	2.16192
OXF-20	0.0527874	0.000689335	0.309581	0.00470219	0.0426784	0.000376081	0.447128		320.43	24.9975	273.856	3.65059	269.414	2.32969
LA-ICP-MS results (CUGW-session 4)
OXF-01	0.0506484	0.000542187	0.284637	0.00373412	0.0408025	0.000294587	0.482561		233.4	25.9175	254.329	2.95653	257.806	1.82988
OXF-02	0.0520325	0.000516105	0.295945	0.0035611	0.0413551	0.000294733	0.452545		287.1	22.22	263.228	2.79588	261.227	1.82996
OXF-03	0.0512192	0.000532683	0.294903	0.00383561	0.0418357	0.000328654	0.51696		250.065	21.295	262.411	3.01294	264.201	2.03856
OXF-04	0.0511595	0.000587946	0.30501	0.00432966	0.0433223	0.000365744	0.52172		255.62	27.775	270.306	3.37377	273.393	2.26465
OXF-05	0.0513526	0.000526771	0.298033	0.00393789	0.042151	0.000340131	0.556673		257.47	24.07	264.863	3.08566	266.152	2.10885
OXF-06	0.0516741	0.000545325	0.295	0.00388421	0.0415185	0.000324854	0.46663		333.39	19.4425	262.487	3.05076	262.239	2.01564
OXF-07	0.052426	0.000595632	0.306856	0.00411663	0.0425827	0.000329054	0.426437		305.615	25.925	271.741	3.20382	268.822	2.03975
OXF-08	0.0514913	0.000602506	0.302122	0.0042141	0.0426912	0.000351113	0.449153		261.175	32.405	268.056	3.29117	269.493	2.17562
OXF-09	0.0522602	0.000714593	0.307463	0.00468767	0.0427872	0.000299754	0.320488		298.21	31.4775	272.213	3.64517	270.086	1.85878
OXF-10	0.0526532	0.000725385	0.301572	0.00450777	0.0418877	0.000343	0.295592		322.28	31.4775	267.628	3.52131	264.523	2.12703
OXF-11	0.0509876	0.000522508	0.291372	0.00363699	0.0415223	0.000294838	0.428712		238.955	24.07	259.639	2.86515	262.262	1.83036
OXF-12	0.0521583	0.000456567	0.302315	0.00363676	0.0421495	0.000357152	0.617682		300.06	24.9975	268.207	2.84135	266.143	2.2139
OXF-13	0.0524196	0.000568649	0.307625	0.0040475	0.0427214	0.000350219	0.484371		301.91	24.0725	272.339	3.14837	269.68	2.17005
OXF-14	0.0514177	0.000585828	0.291624	0.00426514	0.0412198	0.000372638	0.542883		261.175	27.775	259.837	3.3576	260.39	2.31136
OXF-15	0.0516333	0.00056677	0.293499	0.00416672	0.0412748	0.000362148	0.558741		333.39	25.9225	261.31	3.27566	260.73	2.24643
OXF-16	0.0522379	0.000487497	0.304039	0.0039902	0.0422215	0.000389263	0.629899		294.505	20.3675	269.55	3.11235	266.588	2.41199
OXF-17	0.0504824	0.000549757	0.284865	0.00411188	0.0409175	0.000385145	0.584237		216.74	25.92	254.509	3.25408	258.518	2.38929
OXF-18	0.0509111	0.000621295	0.296795	0.00432045	0.0424968	0.000394615	0.474786		235.25	27.775	263.894	3.38765	268.291	2.44445
OXF-19	0.0507387	0.000568765	0.300536	0.0044344	0.0430457	0.000426731	0.607488		227.845	21.2925	266.819	3.46687	271.684	2.64144
OXF-20	0.0526098	0.000421663	0.296463	0.00368663	0.0408099	0.000355437	0.728975		322.28	18.5175	263.634	2.89291	257.851	2.20586
OXF-21	0.0518582	0.000560227	0.29157	0.0040053	0.0409449	0.000379855	0.549649		279.69	24.07	259.794	3.15377	258.687	2.35653
OXF-22	0.0515055	0.00063738	0.293468	0.00421625	0.0414262	0.000387676	0.484842		264.88	32.405	261.286	3.31456	261.667	2.40387
OXF-23	0.0522297	0.000665641	0.302527	0.00445947	0.0420826	0.000339298	0.440199		294.505	29.625	268.372	3.48116	265.729	2.10382
OXF-24	0.049941	0.000601234	0.286334	0.0040716	0.0416762	0.000335927	0.449695		190.82	27.77	255.669	3.21867	263.215	2.08374
OXF-25	0.052169	0.00066208	0.297703	0.00426719	0.0415188	0.000319337	0.385485		300.06	27.775	264.605	3.34369	262.24	1.98158
OXF-26	0.0520499	0.000603799	0.296689	0.00395508	0.0414474	0.000306146	0.396144		287.1	30.5525	263.811	3.10225	261.798	1.90027
OXF-27	0.0520516	0.00069455	0.299523	0.00454581	0.0419564	0.000364818	0.438809		287.1	29.6275	266.027	3.55647	264.948	2.2616
OXF-28	0.0514129	0.000623673	0.293751	0.00405866	0.0415504	0.000322667	0.457246		261.175	27.775	261.508	3.19035	262.436	2.00209
OXF-29	0.0520095	0.000685834	0.302733	0.00448104	0.0423947	0.000325793	0.392488		287.1	31.4775	268.532	3.49741	267.659	2.01996
OXF-30	0.0535187	0.00076708	0.30875	0.00489523	0.0420482	0.000324791	0.335808		350.055	33.33	273.212	3.80246	265.516	2.01436
OXF-31	0.0512161	0.000985876	0.29602	0.00608788	0.041871	0.000316342	0.383926		250.065	44.4375	263.287	4.77298	264.42	1.96252
OXF-32	0.0528733	0.000967988	0.303287	0.00585295	0.0415666	0.000306192	0.376578		324.13	42.59	268.964	4.56366	262.536	1.90036
OXF-33	0.0511971	0.000829516	0.290903	0.00517404	0.0414441	0.000391152	0.39462		250.065	37.0325	259.27	4.07355	261.778	2.42531
OXF-34	0.0519665	0.000766916	0.29569	0.00492363	0.0413747	0.000340487	0.405787		283.395	33.33	263.028	3.8626	261.348	2.11244
OXF-35	0.0517243	0.000634578	0.29366	0.00391381	0.0413905	0.000277932	0.331718		272.285	23.145	261.436	3.07706	261.446	1.72624
OXF-36	0.0511918	0.000774616	0.289537	0.00470504	0.0412294	0.000319114	0.253439		250.065	35.18	258.195	3.70891	260.449	1.98068
OXF-37	0.0526553	0.000830021	0.301476	0.00501823	0.0418424	0.000332368	0.300679		322.28	37.0325	267.552	3.91934	264.243	2.06148
OXF-38	0.051303	0.000854511	0.29132	0.00504425	0.0417193	0.000424744	0.189579		253.77	41.66	259.598	3.97029	263.481	2.63227
OXF-39	0.0517118	0.000765087	0.295401	0.00473913	0.0415519	0.000278827	0.277421		272.285	33.33	262.802	3.719	262.445	1.73154
OXF-40	0.0515979	0.000848314	0.292838	0.00505872	0.0413676	0.000317496	0.229382		333.39	38.885	260.791	3.97703	261.304	1.97047
OXF-41	0.0519228	0.000810821	0.297507	0.00512818	0.0416331	0.000323978	0.37825		283.395	30.5525	264.451	4.01716	262.948	2.01004
OXF-42	0.0511321	0.000599655	0.291822	0.00393431	0.0414461	0.000279254	0.395268		255.62	25.9225	259.993	3.09745	261.79	1.73432
OXF-43	0.0531737	0.000537589	0.300584	0.00368305	0.0410652	0.000296366	0.483541		344.5	22.22	266.856	2.88113	259.432	1.84047
OXF-44	0.0514285	0.000544394	0.291312	0.00381113	0.0410883	0.00028845	0.531623		261.175	24.0725	259.592	3.00196	259.575	1.79157
OXF-45	0.0509394	0.000596019	0.287327	0.00368486	0.0410339	0.000244289	0.289751		238.955	27.775	256.453	2.91167	259.238	1.51918
OXF-46	0.0530202	0.000580182	0.299894	0.00386893	0.0410332	0.000252229	0.429491		327.835	24.0725	266.317	3.02755	259.234	1.56814
OXF-47	0.0514289	0.000565678	0.293478	0.00381824	0.0414722	0.000292188	0.434923		261.175	24.0725	261.293	3.00258	261.952	1.81408
OXF-48	0.0506679	0.000512833	0.286729	0.00347238	0.0410461	0.000242179	0.466067		233.4	22.2175	255.981	2.74564	259.314	1.50616
OXF-49	0.0515546	0.000537787	0.289082	0.0033124	0.0407881	0.00022713	0.300841		264.88	28.7	257.837	2.61499	257.716	1.41366
OXF-50	0.0520212	0.000560736	0.296182	0.00382394	0.0413189	0.000289738	0.49036		287.1	24.0725	263.414	3.00089	261.003	1.79919
OXF-51	0.0514507	0.000489265	0.289435	0.00320394	0.0408859	0.000244039	0.39151		261.175	22.22	258.115	2.52909	258.322	1.5178
OXF-52	0.0513781	0.000538487	0.288335	0.00354857	0.0407473	0.000263492	0.407475		257.47	24.0725	257.248	2.80222	257.464	1.63799
OXF-53	0.0521961	0.000582386	0.298017	0.00381505	0.0414726	0.000276151	0.395206		294.505	-6.48	264.85	2.98978	261.954	1.71514
LA-ICP-MS results (CUGW-line profiles)
OXF-01	0.0511438	0.00104223	0.299044	0.0070718	0.0425719	0.000610399	0.466573		255.62	48.1375	265.654	5.53054	268.755	3.777
OXF-02	0.0504167	0.00119185	0.29032	0.0075762	0.0413658	0.000535681	0.529353		213.035	83.32	258.811	5.96449	261.294	3.31905
OXF-03	0.0508533	0.000993809	0.286694	0.00645193	0.040959	0.000514799	0.502766		235.25	46.285	255.954	5.09446	258.774	3.19109
OXF-04	0.0519743	0.00105756	0.291622	0.00667332	0.0409483	0.00054757	0.414013		283.395	48.145	259.835	5.24907	258.708	3.39388
OXF-05	0.0496531	0.00117174	0.292744	0.0075286	0.0423074	0.000574951	0.448145		188.97	53.695	260.717	5.91598	267.119	3.55885
OXF-06	0.0484985	0.000971985	0.279166	0.00639605	0.0419576	0.000563929	0.424779		124.16	46.29	249.996	5.07993	264.955	3.49186
OXF-07	0.0467159	0.00134685	0.290552	0.00642427	0.0429574	0.000524522	0.544718		35.28	66.66	258.994	5.05757	271.138	3.24532
OXF-08	0.0510998	0.000937422	0.291518	0.00677596	0.0412041	0.000538504	0.626345		255.62	37.9575	259.754	5.33014	260.292	3.33701
OXF-09	0.0515566	0.000900781	0.293431	0.00653967	0.0413206	0.000581981	0.58261		264.88	36.1075	261.257	5.13692	261.014	3.60558
OXF-10	0.0508939	0.000832268	0.293349	0.00566838	0.0418978	0.000485858	0.492246		235.25	37.0275	261.192	4.45368	264.585	3.00948
OXF-11	0.0516926	0.00101617	0.302219	0.0079654	0.0422012	0.000659122	0.658897		272.285	41.6625	268.132	6.21356	266.463	4.07946
OXF-12	0.0507317	0.000898933	0.293834	0.00648546	0.0420962	0.000601922	0.55222		227.845	73.135	261.573	5.09281	265.813	3.72626
OXF-13	0.0504286	0.000886596	0.288954	0.00679911	0.0415587	0.000628326	0.615094		213.035	40.7325	257.736	5.35891	262.487	3.89142
OXF-14	0.0508764	0.000926742	0.288776	0.00580312	0.0414137	0.000536271	0.391461		235.25	42.585	257.595	4.57544	261.59	3.32255
OXF-15	0.0508721	0.000940834	0.292272	0.0064847	0.0417459	0.000576894	0.515636		235.25	42.585	260.346	5.09833	263.646	3.57271
OXF-16	0.0511313	0.000922829	0.291678	0.00629524	0.0413863	0.00051007	0.527145		255.62	37.9575	259.879	4.95182	261.42	3.1606
OXF-17	0.0525023	0.000769955	0.298617	0.00560784	0.0414585	0.000616683	0.670784		305.615	33.33	265.32	4.38846	261.867	3.81976
OXF-18	0.0515649	0.000815546	0.294419	0.0055754	0.0415515	0.000516035	0.538256		264.88	37.0325	262.032	4.37714	262.443	3.197
OXF-19	0.0530432	0.00104115	0.300771	0.00661787	0.0412769	0.000515934	0.409449		331.54	44.44	267.002	5.16911	260.743	3.19718
OXF-20	0.0524195	0.000915361	0.306899	0.00658617	0.0424171	0.000525507	0.648486		301.91	38.885	271.774	5.1204	267.798	3.25301
OXF-21	0.0512525	0.00110549	0.29497	0.0073726	0.0417194	0.000519795	0.526937		253.77	45.3625	262.464	5.7836	263.482	3.21977
OXF-22	0.0514002	0.00113852	0.290223	0.00734206	0.0410298	0.000538196	0.491136		257.47	51.845	258.735	5.78075	259.213	3.33563
OXF-23	0.0506599	0.00121484	0.287181	0.00724327	0.0410472	0.00048779	0.383122		233.4	55.545	256.338	5.71646	259.32	3.02376
OXF-24	0.0511202	0.00123847	0.295027	0.00820736	0.0419786	0.000571885	0.53137		255.62	55.545	262.508	6.43756	265.086	3.54098
OXF-25	0.0521885	0.00110771	0.297003	0.00728621	0.0413295	0.00055391	0.483969		294.505	49.995	264.057	5.70697	261.069	3.43191
OXF-26	0.0518444	0.00100638	0.299189	0.00707007	0.0418976	0.000622737	0.57279		279.69	44.44	265.766	5.52858	264.584	3.85564
OXF-27	0.0519011	0.00131962	0.296227	0.00808338	0.0415396	0.000546839	0.348945		279.69	59.2525	263.449	6.33455	262.369	3.38752
OXF-28	0.0510857	0.000949348	0.296435	0.00668026	0.0420829	0.000574223	0.558824		255.62	37.9575	263.612	5.23513	265.731	3.55509
OXF-29	0.0511729	0.000980573	0.296249	0.00688704	0.0420492	0.000602526	0.545132		255.62	44.4375	263.466	5.39776	265.522	3.73016
OXF-30	0.0513569	0.00109755	0.29205	0.0068996	0.041402	0.000510862	0.395026		257.47	49.9925	260.172	5.42507	261.518	3.16545
OXF-31	0.0518612	0.000914155	0.298322	0.00619615	0.041886	0.000519116	0.468628		279.69	40.7375	265.088	4.8492	264.513	3.21507
OXF-32	0.0518131	0.000976492	0.294796	0.00619015	0.0414613	0.00048549	0.40871		275.99	42.59	262.327	4.85761	261.885	3.0084
OXF-33	0.0516831	0.000952972	0.295801	0.00660227	0.0415099	0.000510662	0.536707		272.285	47.2175	263.115	5.1766	262.185	3.16391
OXF-34	0.0515253	0.00110813	0.290705	0.0068617	0.0412783	0.000560704	0.36301		264.88	54.6225	259.114	5.4009	260.752	3.4741
OXF-35	0.0504485	0.00125798	0.296916	0.00653196	0.0416808	0.000571319	0.499698		216.74	52.7675	263.988	5.11716	263.243	3.53845
OXF-36	0.0516748	0.000963501	0.296161	0.00680716	0.0416296	0.000545537	0.519643		333.39	47.2175	263.397	5.33558	262.926	3.37919
OXF-37	0.0481807	0.0014081	0.289648	0.00695834	0.0416431	0.000472844	0.354539		109.35	68.5125	258.283	5.48135	263.01	2.92973
OXF-38	0.0509521	0.00112878	0.296959	0.00698481	0.0425944	0.000569505	0.38002		238.955	56.47	264.022	5.47132	268.894	3.52427
OXF-39	0.0516337	0.000993348	0.292599	0.0065467	0.04125	0.000553726	0.504723		333.39	44.44	260.603	5.14572	260.576	3.43102
OXF-40	0.0523175	0.00114412	0.302355	0.00730453	0.0420393	0.000576686	0.4968		298.21	47.2175	268.238	5.69791	265.461	3.57046
OXF-41	0.0519232	0.000968379	0.298387	0.00630401	0.0418015	0.000545693	0.458442		283.395	42.5875	265.14	4.93325	263.99	3.37962
OXF-42	0.0512054	0.00239723	0.298651	0.0130801	0.0421351	0.000526273	0.425817		250.065	107.392	265.346	10.2286	266.054	3.25858
OXF-43	0.0499003	0.00199188	0.293929	0.0108168	0.0426433	0.000480792	0.502617		190.82	92.5775	261.647	8.4901	269.197	2.97618
OXF-44	0.0498543	0.00179197	0.285981	0.00972118	0.0415195	0.000509637	0.526976		187.12	115.725	255.391	7.6776	262.245	3.15754
OXF-45	0.0511811	0.00165275	0.298044	0.00925406	0.0422303	0.00049481	0.446399		255.62	74.0625	264.871	7.24115	266.642	3.06389
OXF-46	0.0504503	0.00143591	0.296739	0.00834626	0.042626	0.000501543	0.453519		216.74	64.8025	263.85	6.53782	269.089	3.10437
OXF-47	0.0522215	0.00123554	0.308705	0.00789368	0.0426966	0.000520056	0.601853		294.505	55.55	273.177	6.12727	269.526	3.21851
OXF-48	0.0513063	0.00110089	0.296863	0.00742488	0.0417538	0.000550286	0.619761		253.77	45.3625	263.947	5.8161	263.695	3.40817
OXF-49	0.050769	0.00105097	0.293231	0.00692557	0.0418235	0.00053768	0.509573		231.55	43.51	261.099	5.44053	264.126	3.33002
OXF-50	0.0501235	0.00091855	0.281556	0.00623431	0.0408262	0.000578916	0.496676		211.185	37.955	251.891	4.94244	257.952	3.58825
OXF-51	0.0515024	0.000898591	0.297832	0.00654709	0.04202	0.000619187	0.566352		264.88	34.255	264.706	5.1254	265.342	3.83325
OXF-52	0.0510847	0.000809023	0.295118	0.00560095	0.0420376	0.000545859	0.546699		255.62	35.18	262.58	4.39482	265.451	3.37992
OXF-53	0.0512148	0.000942224	0.294933	0.00596452	0.0415056	0.000495654	0.545765		250.065	45.365	262.435	4.68031	262.158	3.07112
OXF-54	0.0523016	0.000859901	0.295347	0.00633409	0.0409978	0.000584494	0.599887		298.21	41.6625	262.759	4.96831	259.015	3.6222
OXF-55	0.0506751	0.000937925	0.286763	0.00595223	0.041157	0.000495159	0.449733		233.4	74.9875	256.008	4.70013	260.001	3.06903
OXF-56	0.0505602	0.000892058	0.278885	0.00555666	0.0402173	0.000502302	0.434738		220.44	36.1025	249.772	4.41503	254.18	3.11588
OXF-57	0.0519216	0.000917759	0.291379	0.00594478	0.0407948	0.000532263	0.535484		283.395	38.885	259.644	4.67759	257.758	3.29964
OXF-58	0.0527704	0.000926738	0.298081	0.00678604	0.0407966	0.000551438	0.655009		320.43	43.515	264.9	5.31123	257.768	3.41829
OXF-59	0.0507287	0.000875058	0.286966	0.00548639	0.0412199	0.000522276	0.42446		227.845	73.135	256.168	4.33212	260.39	3.23658
OXF-60	0.0510787	0.000954467	0.288962	0.00648039	0.0409776	0.000518746	0.488273		242.66	37.9575	257.742	5.10795	258.889	3.21546
OXF-61	0.0533626	0.000979774	0.315694	0.00741198	0.0431085	0.000751911	0.586896		342.65	42.59	278.585	5.72331	272.072	4.64914
OXF-62	0.0496137	0.00132705	0.296869	0.00627937	0.0406042	0.000573038	0.649638		176.01	58.3225	263.952	4.9197	256.577	3.5526
OXF-63	0.0478655	0.00163139	0.31096	0.00585678	0.0420681	0.000635015	0.583855		100.09	81.4725	274.925	4.54013	265.639	3.93093
OXF-64	0.0514448	0.00109476	0.292889	0.00634656	0.0408201	0.000481823	0.411494		261.175	48.1425	260.831	4.98749	257.915	2.98746
OXF-65	0.0462426	0.00123788	0.281764	0.00657774	0.0418087	0.000537628	0.456913		9.36	62.955	252.056	5.21354	264.034	3.32974
OXF-66	0.0504992	0.000860742	0.292016	0.00609128	0.0419916	0.000572938	0.526351		216.74	34.25	260.145	4.79034	265.166	3.54744
OXF-67	0.0516849	0.000964082	0.294303	0.00636227	0.0414289	0.000538537	0.396704		272.285	47.2175	261.94	4.99439	261.684	3.33652
OXF-68	0.0515908	0.000982452	0.295137	0.00713619	0.041572	0.000665191	0.589738		333.39	37.96	262.594	5.5976	262.57	4.11939
OXF-69	0.0510999	0.00088839	0.292651	0.00600917	0.0417288	0.000552829	0.457921		255.62	38.8825	260.644	4.72356	263.54	3.42397
OXF-70	0.0525049	0.00177298	0.294056	0.00991726	0.0407638	0.000489066	0.239606		305.615	77.77	261.747	7.78363	257.565	3.03243
OXF-71	0.0517752	0.00101357	0.299677	0.00690651	0.0420594	0.00055841	0.48048		275.99	44.44	266.148	5.3988	265.585	3.45742
OXF-72	0.0513181	0.000871803	0.291354	0.00606673	0.0412614	0.00051498	0.48036		253.77	38.8825	259.624	4.7735	260.647	3.19133
OXF-73	0.0516837	0.00101777	0.292193	0.00646241	0.0411041	0.000477704	0.391585		272.285	41.6625	260.284	5.08114	259.673	2.96122
OXF-74	0.0514438	0.00098394	0.296159	0.00668205	0.041864	0.000563097	0.490843		261.175	44.4375	263.395	5.23764	264.377	3.48702
OXF-75	0.0509613	0.00103616	0.293974	0.00702061	0.0418589	0.000542916	0.440467		238.955	48.14	261.683	5.51196	264.345	3.36228
OXF-76	0.0510949	0.00108562	0.292918	0.00699668	0.0417373	0.000532424	0.445327		255.62	52.7675	260.853	5.49765	263.592	3.29779
OXF-77	0.0521807	0.00105096	0.294629	0.00661547	0.0411893	0.000536309	0.390904		294.505	41.6625	262.196	5.1916	260.201	3.32347
OXF-78	0.051338	0.00102661	0.300824	0.00738951	0.0425452	0.00059307	0.501975		257.47	46.29	267.044	5.77088	268.59	3.67002
OXF-79	0.0520517	0.00110247	0.296666	0.00746536	0.0414255	0.000553655	0.478289		287.1	52.7725	263.793	5.84866	261.663	3.43003
OXF-80	0.051088	0.000984917	0.290825	0.00622144	0.0415386	0.000512472	0.389126		255.62	44.435	259.209	4.89705	262.363	3.17501
OXF-81	0.0486059	0.00121719	0.294492	0.00684523	0.0431139	0.000555024	0.412298		127.865	54.625	262.089	5.37227	272.106	3.43318
OXF-82	0.0490827	0.00103528	0.280848	0.006491	0.0418053	0.000515446	0.266001		150.085	54.6225	251.33	5.14853	264.013	3.19263
OXF-83	0.0494715	0.000945631	0.283412	0.00676485	0.041648	0.000579401	0.515075		168.6	44.4375	253.361	5.35484	263.04	3.58853
OXF-84	0.0492164	0.00129288	0.292199	0.00722007	0.0421774	0.000570902	0.409574		166.75	61.1025	260.289	5.67614	266.315	3.53426
OXF-85	0.0524605	0.00105222	0.296757	0.00712083	0.041143	0.000536486	0.465804		305.615	46.2925	263.864	5.57862	259.914	3.32471
OXF-86	0.0491409	0.00103961	0.276985	0.00680091	0.0407702	0.000653237	0.517004		153.79	52.77	248.263	5.41032	257.605	4.04847
OXF-87	0.0514916	0.0011413	0.295488	0.00825621	0.0416059	0.000622281	0.551747		261.175	54.6225	262.87	6.47356	262.78	3.85386
OXF-88	0.0526786	0.00112966	0.295204	0.00705313	0.0410172	0.000543516	0.342175		322.28	49.995	262.648	5.53222	259.135	3.36859
OXF-89	0.0502186	0.000961568	0.288546	0.00664206	0.0417859	0.000523703	0.46144		205.63	44.435	257.414	5.23692	263.893	3.24372
OXF-90	0.0500424	0.000914506	0.284713	0.00622446	0.0414559	0.000550334	0.487394		198.23	42.5825	254.389	4.92259	261.851	3.40939
OXF-91	0.0526946	0.000922514	0.299888	0.00671039	0.0413307	0.000541448	0.573507		316.725	38.885	266.313	5.24482	261.076	3.35483
OXF-92	0.0524048	0.000944423	0.294689	0.00599319	0.0410501	0.000526906	0.448916		301.91	40.7375	262.243	4.70365	259.338	3.26573
OXF-93	0.0511945	0.000915371	0.294581	0.00580783	0.0420293	0.000501718	0.418672		250.065	45.365	262.159	4.55876	265.399	3.10714
OXF-94	0.0505044	0.000920504	0.288418	0.00592636	0.0416217	0.000495168	0.425144		216.74	42.5825	257.313	4.67375	262.877	3.06779
LA-ICP-MS results (CUGB-session 1)
OXF-01	0.050626	0.00132388	0.278813	0.00656779	0.0403353	0.000651124	0.371797		203.1	54.7	249.7	5.2	254.7	4.3
OXF-02	0.0504576	0.00133419	0.289586	0.00782793	0.0420244	0.000666583	0.386111		195.4	59.6	258.2	6.1	265.2	4.3
OXF-03	0.0512846	0.00118065	0.306254	0.00790565	0.0429515	0.000717319	0.408901		270.5	55.5	271.3	6.1	271.4	4.3
OXF-04	0.0527403	0.0010499	0.302793	0.00639676	0.0414531	0.000590584	0.358146		325.3	47.5	268.6	5	262.1	3.7
OXF-05	0.0506841	0.00111714	0.277833	0.00631591	0.0407493	0.000551662	0.337269		171.8	52.5	248.9	5	257.2	3.7
OXF-06	0.0519564	0.00115081	0.315925	0.00834232	0.0432028	0.000668476	0.44832		330.3	54.2	278.7	6.4	272.6	4.3
OXF-07	0.0496184	0.00113017	0.294597	0.00629785	0.0425862	0.000676065	0.392125		202.2	49.3	262.2	4.9	268.9	4.3
OXF-08	0.0496611	0.00102311	0.284535	0.00748235	0.0413838	0.000575353	0.532187		187.6	52	254.2	5.9	261.5	3.7
OXF-09	0.0506461	0.0010021	0.28076	0.00617964	0.0421904	0.000707504	0.567746		112	44	251.3	4.9	266.5	4.3
OXF-10	0.0505232	0.000931346	0.299463	0.00703955	0.0422414	0.00063824	0.585086		262.1	43.5	266	5.5	266.5	3.7
OXF-11	0.0524026	0.00105981	0.304265	0.00723446	0.0427631	0.000666856	0.566244		266.2	45.3	269.8	5.6	270.2	4.3
OXF-12	0.0517427	0.00121941	0.292859	0.00702957	0.0410844	0.000648496	0.27052		271.6	55.9	260.8	5.5	259.6	3.7
OXF-13	0.0515848	0.00102532	0.292846	0.00692038	0.0409827	0.000652221	0.548072		276.4	46.1	260.8	5.4	259	4.3
OXF-14	0.0495205	0.000932498	0.277161	0.00628051	0.0413998	0.000569784	0.584596		126.7	43.5	248.4	5	261.5	3.7
OXF-15	0.0523272	0.00106337	0.291597	0.00614975	0.0405465	0.000592652	0.429788		295	45.1	259.8	4.8	255.9	3.7
OXF-16	0.0538017	0.00124616	0.314134	0.00749716	0.0425171	0.000599337	0.409399		354.3	50.2	277.4	5.8	268.3	3.7
OXF-17	0.0536571	0.00118103	0.305234	0.00685362	0.0414607	0.000544374	0.33344		343.2	49.3	270.5	5.4	262.1	3.1
OXF-18	0.0511	0.0010213	0.303355	0.0065665	0.0426848	0.00066188	0.474334		264.7	46.1	269.1	5.1	269.5	4.3
OXF-19	0.0527191	0.00129513	0.295439	0.00725024	0.0407785	0.00058317	0.287317		307.7	56.6	262.8	5.7	257.8	3.7
OXF-20	0.0527457	0.00117032	0.301222	0.00722434	0.0423909	0.000628157	0.382892		264.2	52	267.3	5.6	267.7	3.7
OXF-21	0.0507237	0.00121088	0.282993	0.00640646	0.040714	0.000554127	0.251382		214.9	54.9	253	5.1	257.2	3.7
OXF-22	0.0518165	0.00115247	0.290384	0.00711293	0.0399092	0.000578872	0.33226		319.6	54.7	258.9	5.6	252.2	3.7
OXF-23	0.0514461	0.00154889	0.295692	0.00877458	0.0416732	0.000579993	0.17521		260.1	70.5	263	6.9	263.4	3.7
OXF-24	0.0522457	0.00128782	0.306046	0.00859527	0.0417729	0.000629449	0.419596		332.8	58.1	271.1	6.7	264	3.7
OXF-25	0.0514121	0.00114707	0.284283	0.00586207	0.0408526	0.000649561	0.356437		214.1	48	254.1	4.7	258.4	3.7
LA-ICP-MS results (CUGB-session 2)
OXF-01	0.0548573	0.00289365	0.311804	0.0159774	0.0409684	0.000694962	-0.0584732		418.543	122.879	275.575	12.3846	259.028	4.33476
OXF-02	0.0543374	0.00303545	0.302838	0.0153944	0.0410471	0.000758935	-0.124794		352.751	128.106	268.585	12.0025	259.028	4.95402
OXF-03	0.0477375	0.00290562	0.267774	0.015066	0.0419581	0.000726972	-0.0270917		10.3853	142.486	240.933	12.0936	265.218	4.3306
OXF-04	0.0536846	0.00386001	0.302304	0.0188939	0.0430425	0.000809219	-0.166554		240.29	157.074	268.195	14.736	271.402	4.94452
OXF-05	0.055077	0.00281243	0.316132	0.016046	0.0421625	0.000653819	0.208324		384.604	112.051	278.898	12.3441	266.455	4.32977
OXF-06	0.0506439	0.00293811	0.290162	0.0171551	0.0414144	0.000706599	-0.0289668		233.53	143.343	258.717	13.5363	261.505	4.3331
OXF-07	0.0539882	0.00285355	0.303781	0.015982	0.0408077	0.000677786	0.241331		371.218	115.533	269.364	12.4606	257.79	4.3356
OXF-08	0.0529315	0.00283167	0.293937	0.0160067	0.0408222	0.000560234	0.23221		296.113	120.941	261.625	12.5559	257.79	3.71623
OXF-09	0.0502223	0.0030839	0.278708	0.0163337	0.0406977	0.000618119	0.00908353		179.296	140.295	249.626	12.9434	257.17	3.71658
OXF-10	0.0463422	0.0022509	0.276127	0.0145741	0.0429367	0.000580708	0.0869684		32.76	128.181	247.559	11.6171	270.784	3.70874
OXF-11	0.0581301	0.00275974	0.313431	0.0134832	0.040379	0.000528477	-0.0363116		462.729	100.283	276.813	10.4368	255.312	3.09805
OXF-12	0.0543209	0.00282187	0.309554	0.0148501	0.0431601	0.000588228	0.0329418		284.423	113.549	273.871	11.5525	272.638	3.70768
OXF-13	0.0538331	0.00254356	0.304275	0.0145793	0.0414872	0.000554365	0.0815609		336.507	110.952	269.753	11.3659	262.124	3.71373
OXF-14	0.0519537	0.00268822	0.296093	0.0150662	0.0413528	0.000540852	-0.165069		279.792	124.317	263.349	11.8295	261.505	3.09507
OXF-15	0.0521055	0.00276696	0.306656	0.0160903	0.0431706	0.000595426	0.0337401		262.858	123.626	271.62	12.5107	272.638	3.70768
OXF-16	0.0534482	0.00334382	0.32058	0.0193643	0.0437348	0.000866195	-0.147194		337.697	151.164	282.364	14.9163	275.727	5.55885
OXF-17	0.0541835	0.00339394	0.322005	0.019498	0.0430768	0.000852074	0.164021		378.737	136.591	283.44	14.9773	272.02	5.56205
OXF-18	0.0483607	0.00313736	0.275755	0.0175703	0.0416182	0.000848476	0.168938		103.399	150.027	247.32	14.0075	262.743	4.95116
OXF-19	0.0483916	0.00270865	0.273694	0.0146398	0.0419663	0.000776357	-0.0444447		62.5525	136.812	245.648	11.639	265.218	4.94926
OXF-20	0.0474553	0.00317535	0.269093	0.0165081	0.043233	0.000716767	0.100256		0.00017	143.76	241.974	13.2013	272.638	4.32562
OXF-21	0.0496341	0.00293341	0.286688	0.0174152	0.0422734	0.000771322	0.050448		155.33	146.692	255.959	13.731	267.074	4.94784
LA-ICP-MS results (WHSS)
OXF-01	0.0519618	0.00285707	0.293733	0.0116491	0.0423327	0.000647281	0.229549		283.395	125.908	261.493	9.14453	267.276	4.00577
OXF-02	0.0491699	0.00336859	0.290543	0.0157267	0.0428362	0.000722429	0.319185		166.75	142.57	258.987	12.3748	270.389	4.46816
OXF-03	0.0526806	0.00326469	0.28762	0.0154604	0.0418552	0.000753793	0.120057		322.28	140.722	256.684	12.1929	264.322	4.66623
OXF-04	0.0545849	0.00330499	0.297915	0.0124238	0.0414411	0.000775607	0.07164		394.495	135.17	264.77	9.72106	261.759	4.80301
OXF-05	0.0562833	0.00278111	0.310025	0.0122745	0.0417241	0.000743573	0.517118		464.86	109.247	274.201	9.51561	263.511	4.60359
OXF-06	0.046641	0.00307071	0.284335	0.0114285	0.0429968	0.000704526	0.12933		31.58	157.39	254.09	9.0369	271.382	4.35691
OXF-07	0.0523717	0.00261832	0.291498	0.0109033	0.042125	0.0008074	0.360628		301.91	114.797	259.738	8.57402	265.991	4.99651
OXF-08	0.0534417	0.00287446	0.290641	0.0138184	0.0419598	0.000678622	0.177047		346.35	122.21	259.064	10.8728	264.97	4.20095
OXF-09	0.0528864	0.00240975	0.295248	0.0120341	0.041545	0.000572525	0.389903		324.13	108.32	262.682	9.43558	262.403	3.54635
OXF-10	0.0487252	0.0021683	0.284753	0.00915777	0.0423655	0.000636353	0.464375		200.075	100.91	254.421	7.23976	267.479	3.93811
OXF-11	0.0485451	0.00267086	0.293282	0.00866405	0.0413801	0.000571331	0.122252		124.16	125.905	261.139	6.80465	261.382	3.5395
OXF-12	0.0518643	0.00207572	0.295893	0.0107726	0.0418689	0.000634997	0.410547		279.69	92.5775	263.187	8.44264	264.407	3.93154
OXF-13	0.0531738	0.00212915	0.29753	0.010513	0.0416517	0.000746972	0.280101		344.5	95.36	264.469	8.22891	263.063	4.62493
OXF-14	0.049837	0.00289007	0.297607	0.0143819	0.0416242	0.000710465	0.345816		187.12	130.538	264.53	11.2553	262.893	4.39923
OXF-15	0.0485738	0.00259321	0.298071	0.0121887	0.0424453	0.000693065	0.389289		127.865	127.755	264.892	9.536	267.972	4.28831
OXF-16	0.0496106	0.00271528	0.294333	0.0106582	0.0415437	0.000750221	0.128564		176.01	127.76	261.964	8.36309	262.394	4.6455
OXF-17	0.0513069	0.00273132	0.290374	0.0115681	0.0417006	0.000743703	0.392662		253.77	122.205	258.854	9.10454	263.365	4.6045
OXF-18	0.0528461	0.00318393	0.294878	0.0149296	0.0416181	0.000885472	0.461421		320.43	132.39	262.391	11.7084	262.855	5.48189
OXF-19	0.0515759	0.002954	0.285741	0.0135632	0.0421614	0.000699785	0.319535		264.88	133.315	255.201	10.7126	266.217	4.33099
OXF-20	0.0488221	0.00314962	0.27485	0.0126329	0.0413494	0.000597218	0.13079		138.975	144.42	246.564	10.0632	261.192	3.69973
OXF-21	0.0476423	0.0031531	0.294338	0.0133757	0.0422466	0.000698316	0.381015		79.72	151.83	261.968	10.4945	266.743	4.32157
OXF-22	0.0517512	0.00299137	0.2828	0.012144	0.0412451	0.000723965	0.152877		275.99	133.318	252.877	9.61398	260.546	4.48432
OXF-23	0.0508598	0.0035266	0.292911	0.0155125	0.041665	0.000692211	0.192997		235.25	161.09	260.848	12.184	263.145	4.28615
OXF-24	0.0515505	0.00302261	0.29104	0.0120284	0.0407412	0.000529249	0.284008		264.88	135.168	259.378	9.46178	257.426	3.28115
OXF-25	0.0539873	0.00321341	0.296772	0.0137729	0.0410311	0.00066697	0.166247		372.275	133.32	263.876	10.7858	259.221	4.13247
OXF-26	0.0492572	0.00294573	0.296337	0.00989368	0.0419289	0.000697462	0.398776		166.75	140.722	263.535	7.75151	264.778	4.31756
OXF-27	0.0544451	0.00279399	0.294781	0.0112239	0.0411381	0.000660497	0.402057		390.79	84.25	262.316	8.80374	259.884	4.09201
OXF-28	0.0550043	0.00282595	0.294746	0.0111152	0.0407597	0.000631021	0.147818		413.01	112.025	262.288	8.71877	257.54	3.91099
OXF-29	0.0529905	0.00252983	0.291855	0.0103857	0.0409911	0.000676416	0.381511		327.835	107.395	260.019	8.16495	258.973	4.19109
OXF-30	0.0511262	0.00253789	0.279127	0.0102781	0.0412792	0.000607803	0.169265		255.62	119.428	249.965	8.16063	260.757	3.76546
OXF-31	0.0562915	0.00238638	0.294376	0.011895	0.040886	0.000717771	0.343264		464.86	92.585	261.998	9.33279	258.322	4.44749
OXF-32	0.0562743	0.00238689	0.301558	0.0113521	0.041982	0.000704759	0.256847		464.86	94.435	267.617	8.85796	265.107	4.36247
OXF-33	0.0511483	0.0027977	0.28943	0.0120667	0.0413558	0.000615678	0.440725		255.62	125.908	258.11	9.50376	261.231	3.81391
OXF-34	0.0521161	0.00256981	0.301665	0.00932617	0.0418446	0.000558424	0.405194		300.06	112.948	267.7	7.27729	264.257	3.4582
OXF-35	0.0532899	0.0024074	0.299946	0.00734564	0.0416499	0.000492612	0.160352		342.65	101.843	266.358	5.74051	263.052	3.05192
OXF-36	0.0514197	0.00260722	0.297723	0.00937464	0.0417922	0.000561169	0.336061		261.175	116.65	264.62	7.33725	263.932	3.47533
OXF-37	0.0553946	0.00295584	0.299067	0.0122034	0.041742	0.000677419	0.147209		427.825	118.507	265.671	9.54019	263.622	4.19436
OXF-38	0.0539174	0.00270814	0.298206	0.0106096	0.0422986	0.000807143	0.462717		368.57	112.953	264.998	8.30016	267.065	4.9941
OXF-39	0.0516556	0.00299523	0.299971	0.00846331	0.0414485	0.000734065	0.290942		333.39	133.315	266.377	6.61302	261.805	4.54595
OXF-40	0.0518169	0.00267623	0.292588	0.011196	0.0419236	0.000765524	0.529653		275.99	118.5	260.594	8.79673	264.745	4.73848
OXF-41	0.0528492	0.00289401	0.300469	0.0110553	0.0434016	0.000805353	0.276332		324.13	124.058	266.767	8.63365	273.883	4.97788
OXF-42	0.0528933	0.00270609	0.297932	0.0092115	0.0422448	0.000683504	0.285202		324.13	112.023	264.784	7.20848	266.733	4.23001
LA-ICP-MS results (IGGCAS)
OXF-01	0.05318	0.00209	0.30489	0.011	0.04151	0.00095	0.634339		336.6	86.59	270.2	8.56	262.2	5.88
OXF-02	0.05042	0.0022	0.29634	0.01193	0.04256	0.00102	0.595317		214.3	98.22	263.5	9.35	268.7	6.33
OXF-03	0.05289	0.00209	0.30013	0.01085	0.04109	0.00096	0.646271		323.9	87.44	266.5	8.48	259.6	5.91
OXF-04	0.05029	0.00197	0.2953	0.01069	0.04253	0.00096	0.623536		208.2	88.49	262.7	8.38	268.5	5.96
OXF-05	0.05188	0.00281	0.30493	0.01516	0.04257	0.00119	0.562269		280.1	120.02	270.2	11.79	268.8	7.33
OXF-06	0.05123	0.00172	0.29344	0.00908	0.04149	0.00088	0.685445		251.4	75.45	261.3	7.13	262	5.43
OXF-07	0.04985	0.00176	0.2899	0.00946	0.04212	0.0009	0.654804		188.1	80.11	258.5	7.45	266	5.58
OXF-08	0.0539	0.00244	0.3086	0.01273	0.04148	0.00106	0.61949		366.6	98.38	273.1	9.88	262	6.59
OXF-09	0.0533	0.00179	0.30518	0.00932	0.04149	0.00091	0.718188		341.6	74.04	270.4	7.25	262	5.61
OXF-10	0.0507	0.00201	0.29652	0.01083	0.04238	0.00098	0.633127		227.1	89.14	263.7	8.48	267.6	6.06
OXF-11	0.05215	0.00175	0.3051	0.00941	0.04239	0.00091	0.696034		292	74.85	270.4	7.32	267.6	5.66
OXF-12	0.05101	0.00189	0.29135	0.00992	0.04139	0.00093	0.659919		241.2	83.11	259.6	7.8	261.4	5.74
OXF-13	0.05201	0.00185	0.29887	0.00972	0.04164	0.00092	0.679349		285.7	79.02	265.5	7.6	263	5.72
OXF-14	0.05402	0.0021	0.31083	0.01106	0.04171	0.00098	0.660319		371.7	85.19	274.8	8.56	263.4	6.09
OXF-15	0.05088	0.00229	0.29688	0.01235	0.0423	0.00105	0.596709		235.2	100.82	264	9.67	267.1	6.5
OXF-16	0.05267	0.00179	0.3055	0.00953	0.04204	0.00092	0.701525		314.6	75.67	270.7	7.42	265.5	5.71
OXF-17	0.04985	0.0017	0.28904	0.00907	0.04203	0.00092	0.697556		187.9	77.62	257.8	7.14	265.4	5.69
OXF-18	0.05138	0.00217	0.30032	0.01162	0.04237	0.00104	0.634385		258	94.12	266.6	9.07	267.5	6.4
OXF-19	0.05339	0.00196	0.30316	0.01018	0.04117	0.00094	0.679941		345.4	80.65	268.9	7.93	260.1	5.84
OXF-20	0.05268	0.00208	0.30405	0.01103	0.04185	0.00099	0.652093		315.2	87.51	269.6	8.58	264.3	6.14
OXF-21	0.05139	0.00192	0.29544	0.0102	0.0417	0.00096	0.666813		258.5	83.77	262.8	7.99	263.3	5.91
OXF-22	0.0514	0.00183	0.29352	0.00955	0.04142	0.00094	0.697513		258.6	79.57	261.3	7.5	261.6	5.83
OXF-23	0.05352	0.00256	0.29363	0.01284	0.0398	0.00106	0.609057		350.6	104.34	261.4	10.08	251.6	6.59
OXF-24	0.05394	0.00227	0.31843	0.01222	0.04282	0.00107	0.651148		368.4	91.4	280.7	9.41	270.3	6.63
OXF-25	0.05069	0.00194	0.29772	0.01054	0.0426	0.00098	0.649806		226.8	86.03	264.6	8.25	268.9	6.05

## Sheet: Table S4
LA-ICP-MS U-Pb dating results for columbite-tantalite Coltan 139 and SN3 using OXF as the reference material
Sample/	207Pb	±1s	207Pb	±1s	206Pb	±1s	Rho		207Pb	±1s	207Pb	±1s	206Pb	±1s
spot #	206Pb	abs	235U	abs	238U	abs			206Pb		235U		238U
LA-ICP-MS results (Coltan 139-session 1)
Coltan 139-01	0.0567324	0.000464223	0.639893	0.00642962	0.0815722	0.000532524	0.756844		479.67	18.5175	502.24	3.99569	505.5	3.18568
Coltan 139-02	0.0568341	0.00050184	0.639045	0.00684945	0.0813501	0.000574314	0.758943		483.375	20.3675	501.715	4.25691	504.177	3.43455
Coltan 139-03	0.0563475	0.000487926	0.628239	0.0064369	0.0804615	0.000542459	0.721092		464.86	13.8875	494.999	4.02819	498.877	3.24769
Coltan 139-04	0.0562304	0.000569913	0.640627	0.00751645	0.082715	0.000576748	0.596737		461.155	22.22	502.694	4.66447	512.308	3.44505
Coltan 139-05	0.0567931	0.000571436	0.636023	0.00747779	0.0809736	0.000585566	0.701939		483.375	22.22	499.841	4.65345	501.931	3.50254
Coltan 139-06	0.0573233	0.000621051	0.650358	0.00813668	0.0819606	0.000603417	0.715443		505.595	24.0725	508.699	5.01803	507.815	3.60565
Coltan 139-07	0.0568742	0.000507426	0.654379	0.00713596	0.083049	0.000595471	0.77233		487.08	13.8875	511.17	4.3935	514.296	3.55516
Coltan 139-08	0.0566996	0.000534418	0.64136	0.00714861	0.0816581	0.000585731	0.745899		479.67	22.22	503.148	4.43551	506.012	3.50149
Coltan 139-09	0.056451	0.000575238	0.636301	0.00750942	0.081171	0.000624421	0.742515		477.82	22.22	500.014	4.67225	503.109	3.73297
Coltan 139-10	0.0574744	0.00062101	0.650564	0.00842205	0.0814044	0.000690635	0.828997		509.3	22.22	508.826	5.19256	504.5	4.12598
Coltan 139-11	0.0581866	0.000598004	0.66975	0.00802837	0.0830407	0.000603119	0.746855		600.025	22.22	520.56	4.89491	514.247	3.60058
Coltan 139-12	0.0584014	0.000649935	0.66101	0.00856445	0.0818095	0.000701728	0.692593		546.33	24.07	515.232	5.2472	506.915	4.19049
Coltan 139-13	0.0557827	0.000561457	0.621727	0.00730295	0.0805024	0.00056535	0.684455		442.64	22.22	490.929	4.58464	499.121	3.3837
Coltan 139-14	0.0559576	0.000602684	0.624014	0.00760533	0.0806085	0.000576082	0.615953		450.045	24.0725	492.36	4.76686	499.754	3.44722
Coltan 139-15	0.0565876	0.000587136	0.631899	0.00772284	0.0806659	0.00054426	0.687968		475.97	22.22	497.278	4.81711	500.096	3.25785
Coltan 139-16	0.0557738	0.000619579	0.619748	0.00784587	0.0802683	0.000503592	0.549631		442.64	30.5525	489.69	4.92966	497.724	3.01714
Coltan 139-17	0.0577886	0.000482344	0.645551	0.00649812	0.0809427	0.000496171	0.695216		520.41	18.5175	505.737	4.02437	501.747	2.97139
Coltan 139-18	0.0577149	0.000515211	0.643712	0.0071056	0.0808193	0.000553164	0.749675		520.41	20.3675	504.602	4.40279	501.011	3.31035
Coltan 139-19	0.0581848	0.000509689	0.652992	0.00692989	0.0812299	0.000512641	0.627877		600.025	24.9975	510.318	4.27094	503.46	3.06849
Coltan 139-20	0.0578791	0.000549801	0.64456	0.00763413	0.0806455	0.000621146	0.662521		524.11	20.3675	505.126	4.72595	499.975	3.71517
Coltan 139-21	0.0571158	0.000492266	0.638576	0.00674637	0.0810013	0.00057559	0.658074		494.485	23.145	501.424	4.19443	502.097	3.44315
Coltan 139-22	0.0552167	0.000513192	0.617416	0.00707585	0.0809063	0.000571782	0.62064		420.42	-12.035	488.227	4.45447	501.53	3.42078
Coltan 139-23	0.0563594	0.000504533	0.619768	0.00721756	0.0799075	0.000656022	0.783846		464.86	15.74	489.702	4.5367	495.57	3.9252
Coltan 139-24	0.0558655	0.000543188	0.627506	0.00722855	0.0815496	0.000535146	0.65948		455.6	22.22	494.541	4.52233	505.365	3.20131
Coltan 139-25	0.0570699	0.000423125	0.638104	0.0059843	0.0809828	0.000481575	0.685703		494.485	16.665	501.131	3.725	501.987	2.88462
Coltan 139-26	0.057087	0.000438754	0.634134	0.00577906	0.0804506	0.000423317	0.67628		494.485	21.295	498.668	3.60684	498.812	2.54001
Coltan 139-27	0.0576026	0.000460362	0.650752	0.00642594	0.0817955	0.000506083	0.666577		522.26	16.665	508.941	3.96774	506.831	3.02814
Coltan 139-28	0.0573307	0.000416969	0.648441	0.00585526	0.0818958	0.000453097	0.716456		505.595	16.665	507.519	3.62312	507.429	2.71362
Coltan 139-29	0.057434	0.000462919	0.636549	0.00606307	0.0802767	0.00044783	0.631168		509.3	12.035	500.168	3.77712	497.774	2.68586
Coltan 139-30	0.0569609	0.000434066	0.634569	0.00582176	0.0807607	0.000462776	0.623577		500.04	16.665	498.938	3.63231	500.662	2.77353
LA-ICP-MS results (Coltan 139-session 2)
Coltan 139-01	0.0573444	0.00107426	0.64748	0.0133052	0.0817521	0.000862267	0.801808		505.595	40.735	506.927	8.20754	506.573	5.14573
Coltan 139-02	0.0576852	0.000582548	0.64604	0.00801259	0.0809635	0.000703365	0.814762		516.705	22.22	506.039	4.95464	501.871	4.20332
Coltan 139-03	0.0562337	0.000631131	0.631895	0.00866907	0.0814283	0.000705361	0.756903		461.155	25.925	497.276	5.40458	504.643	4.21349
Coltan 139-04	0.0556923	0.000660906	0.609065	0.00843743	0.0792414	0.000628083	0.702831		438.935	25.925	482.971	5.33447	491.593	3.76098
Coltan 139-05	0.0564218	0.000508826	0.626744	0.00669661	0.080344	0.00054155	0.703761		477.82	18.5175	494.066	4.19338	498.176	3.24261
Coltan 139-06	0.0572372	0.000528955	0.650879	0.0075381	0.0821859	0.000583283	0.692175		501.89	20.37	509.02	4.64926	509.157	3.48539
Coltan 139-07	0.0573639	0.000519217	0.631316	0.00680001	0.0796348	0.000547835	0.725229		505.595	18.515	496.915	4.24601	493.943	3.28194
Coltan 139-08	0.0569478	0.00069603	0.658526	0.00820777	0.0824247	0.000606756	0.770259		500.04	27.775	513.712	5.03709	510.579	3.62406
Coltan 139-09	0.0569047	0.000472919	0.629079	0.00651607	0.0800305	0.000516191	0.736994		487.08	13.8875	495.522	4.07533	496.305	3.09264
Coltan 139-10	0.0580496	0.00121925	0.651064	0.0146841	0.0810391	0.000880711	0.729457		531.52	46.2925	509.133	9.03714	502.322	5.25882
Coltan 139-11	0.0573439	0.000498119	0.649475	0.0070932	0.0819215	0.000536903	0.669005		505.595	18.515	508.156	4.38008	507.582	3.21075
Coltan 139-12	0.0561926	0.000491089	0.628955	0.00642033	0.0809874	0.00048207	0.679385		461.155	20.3675	495.445	4.01616	502.014	2.88756
Coltan 139-13	0.0566205	0.000427711	0.637296	0.00589528	0.0814311	0.000480475	0.751905		475.97	16.665	500.631	3.67183	504.659	2.87705
Coltan 139-14	0.0565856	0.000495722	0.630944	0.00653033	0.0807366	0.000540741	0.721265		475.97	18.5175	496.684	4.07962	500.518	3.23673
Coltan 139-15	0.0566067	0.000864841	0.61508	0.0106575	0.0787998	0.00058105	0.750411		475.97	33.33	486.759	6.70842	488.955	3.48211
Coltan 139-16	0.0563941	0.0011023	0.628289	0.0138461	0.0806932	0.000628691	0.788977		477.82	37.96	495.029	8.64084	500.259	3.7599
Coltan 139-17	0.0568451	0.000714095	0.628078	0.00913913	0.0800733	0.000557799	0.702682		487.08	32.405	494.898	5.70973	496.56	3.34001
Coltan 139-18	0.0573379	0.000671777	0.639247	0.00879107	0.0807309	0.000568863	0.736577		505.595	25.925	501.84	5.45605	500.484	3.40394
Coltan 139-19	0.0569113	0.000492756	0.634591	0.00718192	0.0805343	0.000578885	0.830206		487.08	13.8875	498.952	4.47418	499.311	3.46411
Coltan 139-20	0.0562007	0.000697171	0.629653	0.00811744	0.0809434	0.000498982	0.619688		461.155	27.775	495.88	5.06894	501.751	2.98809
LA-ICP-MS results (SN3-session 1)
SN3-01	0.0547083	0.000582545	0.487094	0.00598092	0.0644827	0.00046779	0.569437		466.71	28.7	402.928	4.09293	402.83	2.84123
SN3-02	0.05441	0.000491457	0.492017	0.00540483	0.0654783	0.000474417	0.672677		387.09	20.37	406.284	3.68859	408.856	2.87882
SN3-03	0.0534547	0.000519489	0.47053	0.00542674	0.0637219	0.000455108	0.67062		346.35	20.3675	391.555	3.75654	398.221	2.76644
SN3-04	0.0548826	0.000550927	0.484389	0.0055464	0.0639464	0.000443225	0.546817		405.605	24.0725	401.08	3.80375	399.581	2.69414
SN3-05	0.054545	0.000606571	0.479772	0.00642631	0.0637099	0.000536811	0.686889		394.495	24.0725	397.917	4.41787	398.148	3.26034
SN3-06	0.0543354	0.000730034	0.483902	0.00777048	0.0646029	0.00059297	0.678667		383.385	31.4775	400.746	5.32405	403.558	3.59718
SN3-07	0.0539833	0.00109789	0.478002	0.0108106	0.0643292	0.00055562	0.505249		368.57	46.2925	396.701	7.43174	401.9	3.37226
SN3-08	0.0535312	0.000890066	0.476839	0.00943394	0.0645688	0.000626159	0.807621		350.055	32.405	395.902	6.49178	403.351	3.79791
SN3-09	0.0543126	0.000895663	0.491203	0.00978861	0.0653487	0.000852722	0.670627		383.385	37.035	405.73	6.67092	408.072	5.16451
SN3-10	0.054327	0.000845533	0.500878	0.00954247	0.066652	0.000841512	0.627508		383.385	35.1825	412.296	6.46182	415.953	5.09072
SN3-11	0.0540513	0.000842309	0.479845	0.00916352	0.0641044	0.000732431	0.649761		372.275	35.1825	397.967	6.29329	400.538	4.44239
SN3-12	0.053182	0.000829268	0.480618	0.00922947	0.0653197	0.000771004	0.575162		344.5	35.1825	398.497	6.33522	407.897	4.67066
SN3-13	0.0520336	0.000812476	0.447107	0.00835535	0.0621536	0.000726726	0.594039		287.1	35.1825	375.251	5.8682	388.709	4.41563
SN3-14	0.0537381	0.000762116	0.485852	0.0086243	0.0653837	0.000766932	0.672268		361.165	31.4775	402.08	5.89991	408.284	4.64578
SN3-15	0.0536207	0.000958403	0.483504	0.0100555	0.0652639	0.00083953	0.665763		353.76	36.1075	400.474	6.88784	407.559	5.08516
SN3-16	0.0535733	0.000917634	0.489332	0.0101425	0.0660438	0.00087247	0.734066		353.76	34.255	404.455	6.92035	412.276	5.28056
SN3-17	0.0545075	0.000858662	0.49158	0.00958068	0.0653248	0.000793959	0.655847		390.79	30.5525	405.987	6.52782	407.927	4.8094
SN3-18	0.0542311	0.000787662	0.48166	0.00916108	0.064361	0.000829989	0.672861		388.94	33.33	399.211	6.28396	402.093	5.0316
SN3-19	0.0540654	0.00102134	0.495876	0.0115024	0.0664489	0.000913592	0.580396		372.275	42.5875	408.907	7.81262	414.726	5.52697
SN3-20	0.0541491	0.00104231	0.459714	0.0102105	0.0614722	0.000831442	0.515505		375.98	44.44	384.059	7.10727	384.572	5.05369
SN3-21	0.0520313	0.00105447	0.454845	0.0106474	0.0631803	0.000883855	0.586215		287.1	46.2925	380.667	7.43565	394.937	5.36335
SN3-22	0.0584227	0.00112775	0.520999	0.0112838	0.064141	0.000842309	0.520169		546.33	42.5875	425.819	7.53833	400.76	5.10718
SN3-23	0.0572199	0.00106813	0.485057	0.0101769	0.0613398	0.000769483	0.466052		498.19	40.7375	401.537	6.96366	383.769	4.67831
SN3-24	0.0543701	0.000811683	0.494757	0.00935109	0.0659598	0.000834907	0.674797		387.09	33.33	408.147	6.35822	411.769	5.05401
LA-ICP-MS results (SN3-session 2)
SN3-01	0.0570804	0.00100696	0.489727	0.00736352	0.0638553	0.000640945	0.667563		494.485	38.885	404.724	5.02644	399.029	3.88977
SN3-02	0.0562939	0.000998013	0.497658	0.00678774	0.065407	0.000572163	0.64136		464.86	34.255	410.116	4.6104	408.425	3.46898
SN3-03	0.054206	0.00114166	0.480627	0.00697062	0.0636855	0.000564128	0.610764		388.94	50.92	398.503	4.78798	398	3.42562
SN3-04	0.0547775	0.000959688	0.481186	0.00603361	0.0645276	0.000497432	0.614787		466.71	38.885	398.886	4.14504	403.101	3.02013
SN3-05	0.0546591	0.000953585	0.467448	0.00600364	0.0629923	0.0005129	0.633961		398.2	34.255	389.424	4.16258	393.798	3.11769
SN3-06	0.054202	0.000559969	0.478907	0.00655027	0.0639154	0.000614806	0.703275		388.94	49.995	397.323	4.50537	399.393	3.73143
SN3-07	0.0546051	0.000550182	0.473746	0.00664629	0.0628502	0.000639154	0.724877		394.495	22.22	393.773	4.58699	392.936	3.88241
SN3-08	0.055793	0.000722754	0.480098	0.00792764	0.0622471	0.000671911	0.6537		442.64	27.775	398.14	5.44529	389.277	4.08301
SN3-09	0.0553579	0.00034358	0.493978	0.00520242	0.0646831	0.000584215	0.857598		427.825	12.9625	407.618	3.54668	404.043	3.54401
SN3-10	0.0501887	0.00159457	0.482622	0.0101235	0.0662201	0.000591063	0.342967		211.185	74.0625	399.87	6.93845	413.343	3.58056
SN3-11	0.0521203	0.00145198	0.488578	0.00878196	0.0645186	0.000554055	0.38757		300.06	60.18	403.941	5.99661	403.047	3.36225
SN3-12	0.0551121	0.00127189	0.488799	0.00957015	0.0643822	0.000660647	0.582238		416.715	56.475	404.092	6.53276	402.221	4.00709
SN3-13	0.0597658	0.00193142	0.517837	0.0101372	0.0659435	0.000531031	0.311789		594.47	70.36	423.706	6.78758	411.67	3.21915
SN3-14	0.0606184	0.00181935	0.518877	0.0102141	0.0668405	0.000537157	0.275394		633.35	69.4325	424.401	6.83432	417.092	3.25359
SN3-15	0.0562623	0.00116656	0.498603	0.00906469	0.0664132	0.000847287	0.798364		461.155	46.2925	410.756	6.14816	414.51	5.1267
SN3-16	0.0547803	0.00116148	0.4924	0.00825698	0.065254	0.000678236	0.696729		466.71	48.1425	406.545	5.62459	407.499	4.11026
SN3-17	0.0528847	0.00121311	0.513193	0.00866898	0.0673638	0.000773431	0.748648		324.13	21.295	420.594	5.82409	420.254	4.6767
SN3-18	0.0565089	0.00125549	0.488711	0.00866367	0.0646019	0.000648617	0.693048		472.265	43.515	404.032	5.91548	403.551	3.93357
SN3-19	0.0597773	0.00128616	0.503618	0.00949917	0.0661567	0.000691365	0.685165		594.47	46.2875	414.149	6.4209	412.959	4.18622
SN3-20	0.0570308	0.00141812	0.514676	0.00925301	0.0668504	0.000630693	0.739458		500.04	55.55	421.589	6.2095	417.152	3.8176
